# Supplementary material for: Anti-CA15.3 and Anti-CA125 Antibodies and Ovarian Cancer Risk: Results from the EPIC Cohort
Source: Oxford University Press journal article supplement (doi:10.1158/1055-9965.epi-17-0744), 2018-04-16
Supplement: 10559965epi170744-sup-187659_2_supp_4503765_p2gbf5.doc [file 10559965epi170744-sup-187659_2_supp_4503765_p2gbf5.doc]

Supplemental Table 1. Association between tumor characteristics and anti-CA15.3 and anti-CA125 antibodies levels

|  | **N (%)** |  | **Anti-CA15.3 antibodies** | |  | **Anti-CA125 antibodies** | |
| --- | --- | --- | --- | --- | --- | --- | --- |
|  |  | **Mean (95% CI)*** | **p** |  | **Mean (95% CI)*** | **p** |
| **Age at diagnosis (years)** |  |  |  |  |  |  |  |
| ≤56.9 | 202 (25) |  | 9418 (6089, 14568) | Ref. |  | 4965 (3529, 6984) | Ref. |
| 57.0-62.6 | 200 (25) |  | 8527 (6726, 10812) | 0.65 |  | 4373 (3632, 5265) | 0.47 |
| 62.7-68.6 | 204 (25) |  | 6975 (5458, 8912) | 0.31 |  | 3693 (3048, 4474) | 0.20 |
| >68.6 | 200 (25) |  | 7400 (4888, 11203) | 0.55 |  | 3695 (2671, 5111) | 0.35 |
| p-trend |  |  |  | 0.50 |  |  | 0.32 |
|  |  |  |  |  |  |  |  |
| **Histology** |  |  |  |  |  |  |  |
| Serous | 443 (55) |  | 7984 (6891, 9250) | Ref. |  | 4210 (3753, 4724) | Ref. |
| Mucinous | 58 (7) |  | 8279 (5499, 12464) | 0.87 |  | 5040 (3661, 6940) | 0.30 |
| Endometrioid | 96 (12) |  | 9425 (6834, 12998) | 0.36 |  | 4625 (3597, 5946) | 0.51 |
| Clear cell | 36 (4) |  | 6286 (3748, 10543) | 0.39 |  | 3243 (2164, 4859) | 0.23 |
| NOS | 135 (17) |  | 8285 (6296, 10903) | 0.82 |  | 3740 (3017, 4635) | 0.35 |
| Other/unknown | 38 (5) |  | 6033 (3567, 10203) | 0.32 |  | 3588 (2379, 5411) | 0.46 |
|  |  |  |  |  |  |  |  |
| **Grade** |  |  |  |  |  |  |  |
| 1 | 45 (10) |  | 8672 (5444, 13814) | Ref. |  | 4474 (3116, 6424) | Ref. |
| 2 | 164 (35) |  | 7572 (5967, 9609) | 0.61 |  | 4347 (3612, 5231) | 0.89 |
| 3 | 262 (56) |  | 8589 (7120, 10361) | 0.97 |  | 4225 (3652, 4888) | 0.78 |
|  |  |  |  |  |  |  |  |
| **Stage** |  |  |  |  |  |  |  |
| Local | 115 (16) |  | 7715 (5758, 10337) | Ref. |  | 4243 (3378, 5331) | Ref. |
| Regional | 128 (18) |  | 7206 (5468, 9495) | 0.74 |  | 3622 (2920, 4491) | 0.32 |
| Metastatic | 466 (66) |  | 7887 (6834, 9103) | 0.90 |  | 4115 (3679, 4601) | 0.81 |
|  |  |  |  |  |  |  |  |
| **Time between blood collection and diagnosis (years)** | | | |  |  |  |  |
| ≤1 | 194 (24) |  | 12743 (6399, 25380) | Ref. |  | 5858 (3415, 10046) | Ref. |
| >1-3 |  |  | 9163 (5530, 15184) | 0.20 |  | 4682 (3153, 6953) | 0.26 |
| >3-6 | 199 (25) |  | 9363 (7144, 12271) | 0.32 |  | 4227 (3420, 5225) | 0.18 |
| >6-9 | 195 (24) |  | 7372 (5750, 9453) | 0.19 |  | 4137 (3405, 5025) | 0.28 |
| >9 | 218 (27) |  | 6084 (3668, 10092) | 0.20 |  | 3446 (2319, 5122) | 0.24 |
|  |  |  |  | 0.27 |  |  | 0.38 |
